# Supplementary material for: Chemical recycling of polycarbonate waste into advanced aviation fuel candidates via nickel–oxygen vacancy dual sites
Source: Royal Society of Chemistry journal article supplement (doi:10.1039/d5gc04561d), 2025-11-19
Supplement: d5gc04561d1.pdf [file d5gc04561d1.pdf]

## ***Supporting Information***

### **Chemical recycling of polycarbonate waste into advanced aviation fuel candidates via nickel-oxygen vacancy dual sites**

*Yushuang Huang<sup>a,b,c</sup>, Jiawei Xie<sup>a,c,d,\*</sup>, Yisong Zhou<sup>a,b,c</sup>, Qianqian Song<sup>d</sup>, Yuan Lei<sup>d</sup>, Chang-an Zhou<sup>c</sup>, Chao Wang<sup>c</sup>, Kui Ma<sup>c</sup>, Lei Song<sup>c</sup>, Hairong Yue<sup>a,c</sup> and Ji-Jun Zou<sup>e</sup>*

[a] Institute of New Energy and Low-Carbon Technology, Sichuan University, Sichuan 610207, China

[b] College of Materials and Chemistry and Chemical Engineering, Chengdu University of Technology, Sichuan 610059, China

[c] School of Chemical Engineering, Sichuan University, Sichuan 610065, China

[d] State Key Laboratory of Advanced Polymer Materials (Sichuan University), Sichuan University, Sichuan 610065, China

[e] School of Chemical Engineering and Technology, Tianjin University, Tianjin, 300072, China

\* Corresponding author: Jiawei Xie (xiejiawei@scu.edu.cn)

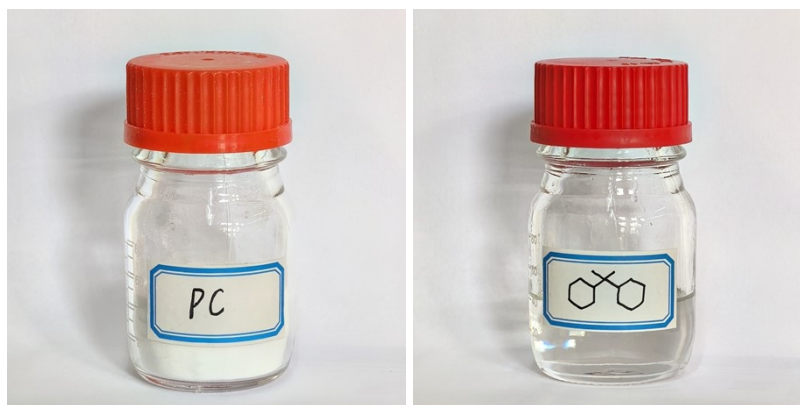

**Figure S1.** Photographs of polycarbonate (PC) powder and the obtained C15 dicycloalkane product.



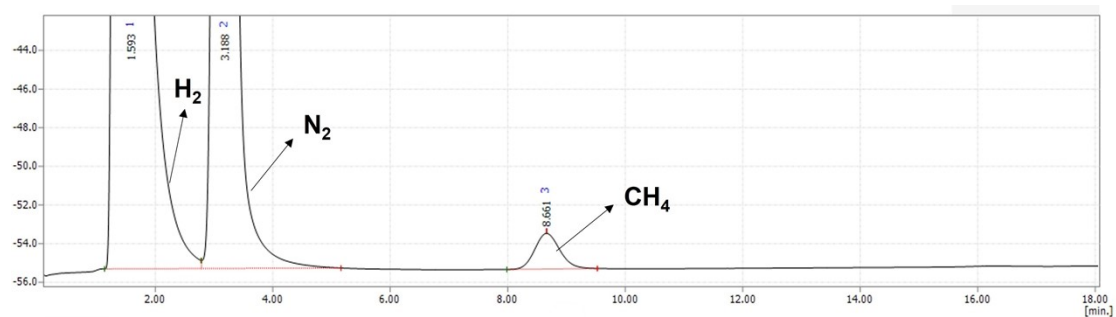

**Figure S3.** GC chromatogram of the gas phase products from the HDO of PC over the 15Ni/CeO<sub>2</sub>. Reaction conditions: 0.3 g PC, 0.06 g 15Ni/CeO<sub>2</sub>, 30 mL cyclopentane, 4 MPa H<sub>2</sub>, 523 K.

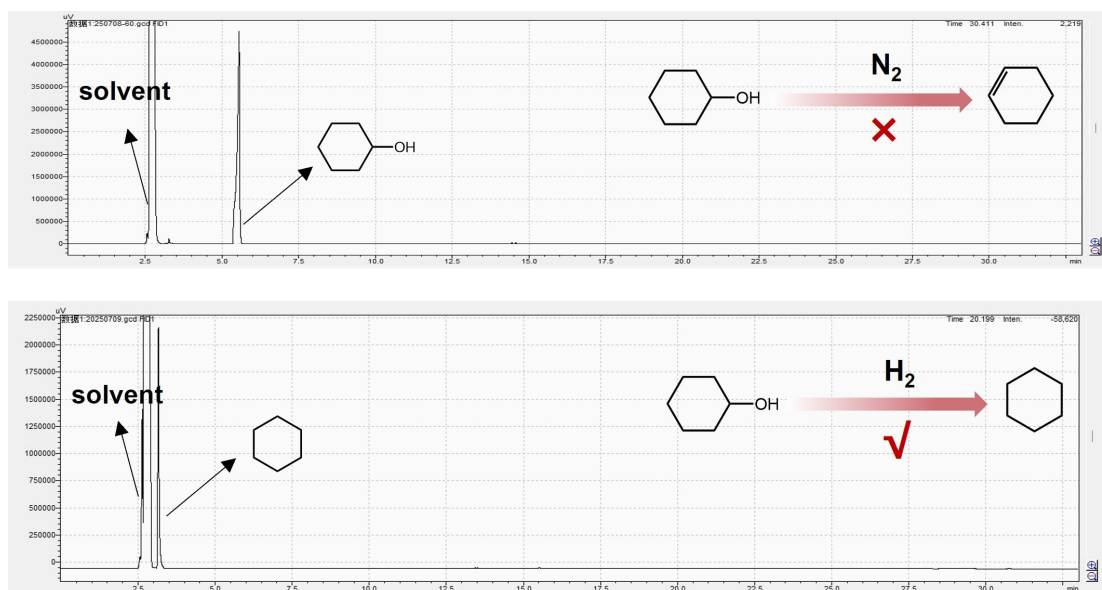

**Figure S4.** GC chromatogram of products using cyclohexanol as feedstock. Reaction conditions: 0.3 g cyclohexanol, 0.06 g 15Ni/CeO<sub>2</sub>, 30 mL cyclopentane, N<sub>2</sub>/H<sub>2</sub> atmosphere, 453 K.

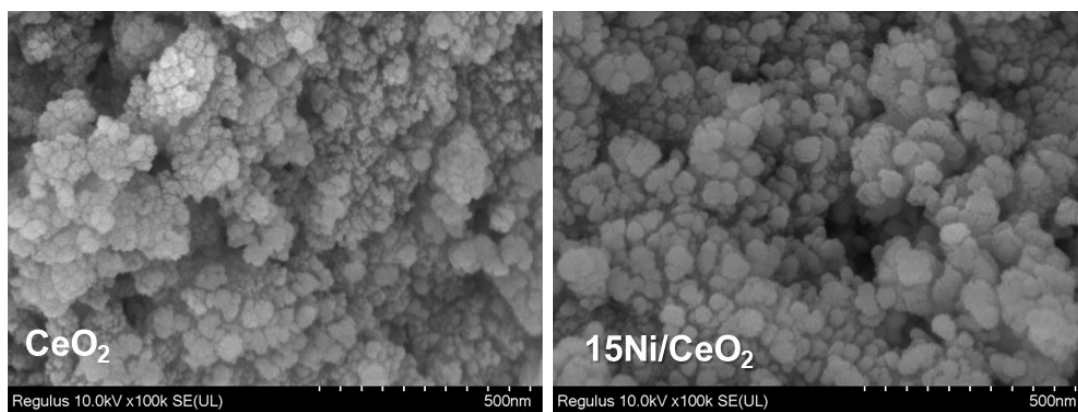

**Figure S5.** SEM images of  $\text{CeO}_2$  and  $15\text{Ni}/\text{CeO}_2$ .

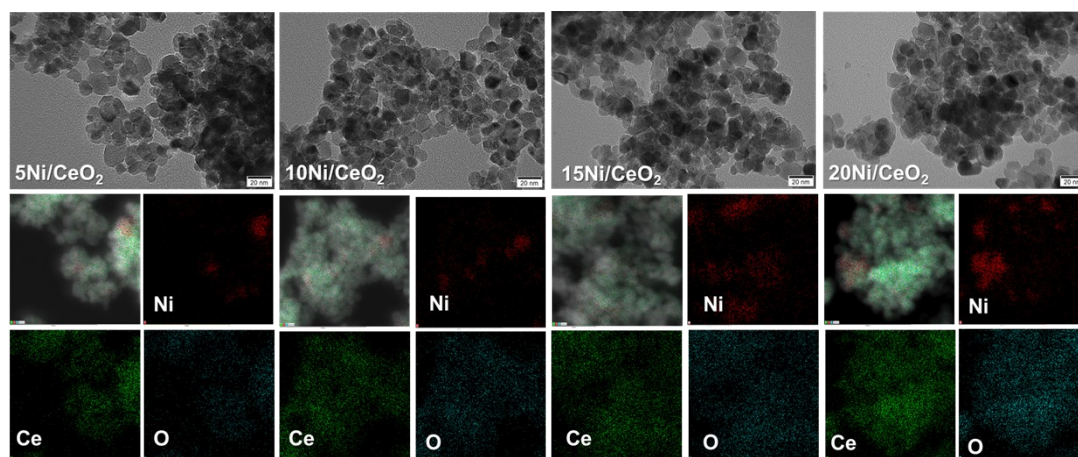

**Figure S6.** TEM images and EDS spectra of Ni/CeO<sub>2</sub> catalysts.

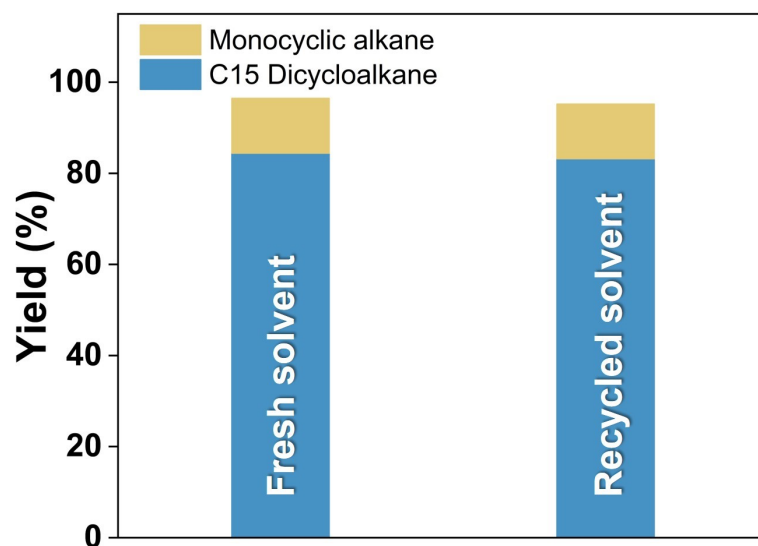

**Figure S7.** The HDO results of PC powder using the recycled solvent. Reaction conditions: 0.3 g PC, 0.06 g 15Ni/CeO<sub>2</sub>, 30 mL cyclopentane/recycled cyclopentane, 4 MPa H<sub>2</sub>, 523 K.



**Table S1.** Yield of saturated alkanes under different catalytic systems.

| Entry | Catalysts                                     | Yield of saturated hydrocarbons (%) |                            |       | Ref. |
|-------|-----------------------------------------------|-------------------------------------|----------------------------|-------|------|
|       |                                               | Monocyclic saturated alkanes        | Bicyclic saturated alkanes | Total |      |
| 1     | Rh/C + H-USY                                  | /                                   | 86.9                       | 86.9  | 1    |
| 2     | Ru-Ni/H $\beta$                               | 8.2                                 | 89.4                       | 97.6  | 2    |
| 3     | Ru-ReO <sub>x</sub> /SiO <sub>2</sub> +HZSM-5 | 5.7                                 | 93.4                       | 99.1  | 3    |
| 4     | Ni/HZSM-5                                     | 18.1                                | 81.2                       | 99.3  | 4    |
| 5     | Pd/C + La(OTf) <sub>3</sub>                   | 4                                   | 95                         | 99    | 5    |
| 6     | <b>This work</b>                              | 12.1                                | 84.4                       | 96.5  |      |

**Table S2.** Properties and chemical composition of pristine PC powder.

| Average molecular weight <sup>a</sup> | Chemical composition (%) <sup>b</sup> |      |       |
|---------------------------------------|---------------------------------------|------|-------|
|                                       | C                                     | H    | O     |
| 35976                                 | 74.58                                 | 5.35 | 17.75 |

<sup>a</sup> Measured by U.S. Agilent PL-GPC50 & Agilent PL-GPC220 gel permeation chromatography (GPC).

<sup>b</sup> Measured by an elemental analyzer (EA, Elementar Unicube, Germany).

**Table S3.** Characteristics of Ni/CeO<sub>2</sub> catalysts.

| Sample                | Ni content (wt%) <sup>a</sup> | BET Surface area (m <sup>2</sup> /g) <sup>b</sup> |               |                    | Pore size (nm) <sup>c</sup> | D <sub>Ni</sub> (%) <sup>d</sup> |
|-----------------------|-------------------------------|---------------------------------------------------|---------------|--------------------|-----------------------------|----------------------------------|
|                       |                               | Micropore area                                    | External area | Total surface area |                             |                                  |
| 5Ni/CeO <sub>2</sub>  | 4.30                          | 2.56                                              | 41.87         | 44.44              | 11.1261                     | 0.58                             |
| 10Ni/CeO <sub>2</sub> | 10.36                         | 2.24                                              | 44.23         | 46.46              | 10.3561                     | 0.52                             |
| 15Ni/CeO <sub>2</sub> | 15.76                         | 1.88                                              | 42.77         | 44.65              | 10.3778                     | 0.38                             |
| 20Ni/CeO <sub>2</sub> | 21.04                         | 1.84                                              | 44.78         | 46.62              | 8.8266                      | 0.28                             |

<sup>a</sup> Ni content of catalyst was determined by ICP-OES.

<sup>b</sup> Micropore surface area and external surface area were calculated by t-plot method, specific surface area was calculated by BET equation.

<sup>c</sup> Pore size was determined using the BJH.

<sup>d</sup> The Ni dispersions was determined by H<sub>2</sub> plus chemisorption.

## References

- 1 L. Wang, G. Li, Y. Cong, A. Wang, X. Wang, T. Zhang, N. Li, *Green. Chem.*, 2021, **23**, 3693-3699.
- 2 A. K. Manal, G. V. Shanbhag, R. Srivastava, *Appl. Catal. B: Environ.*, 2023, **338**, 123021.
- 3 M. Soltani, J. E. Rorrer, *Angew. Chem. Int. Ed.*, 2023, **62**, e202314530.
- 4 J. Liu, J. Wei, X. Feng, M. Song, S. Shi, S. Liu, G. Liu, *Appl. Catal. B: Environ.*, 2023, **338**, 123050.
- 5 J. Luo, J. Deng, *ACS Sustain. Chem. Eng.*, 2023, **11**, 17120-17129.
